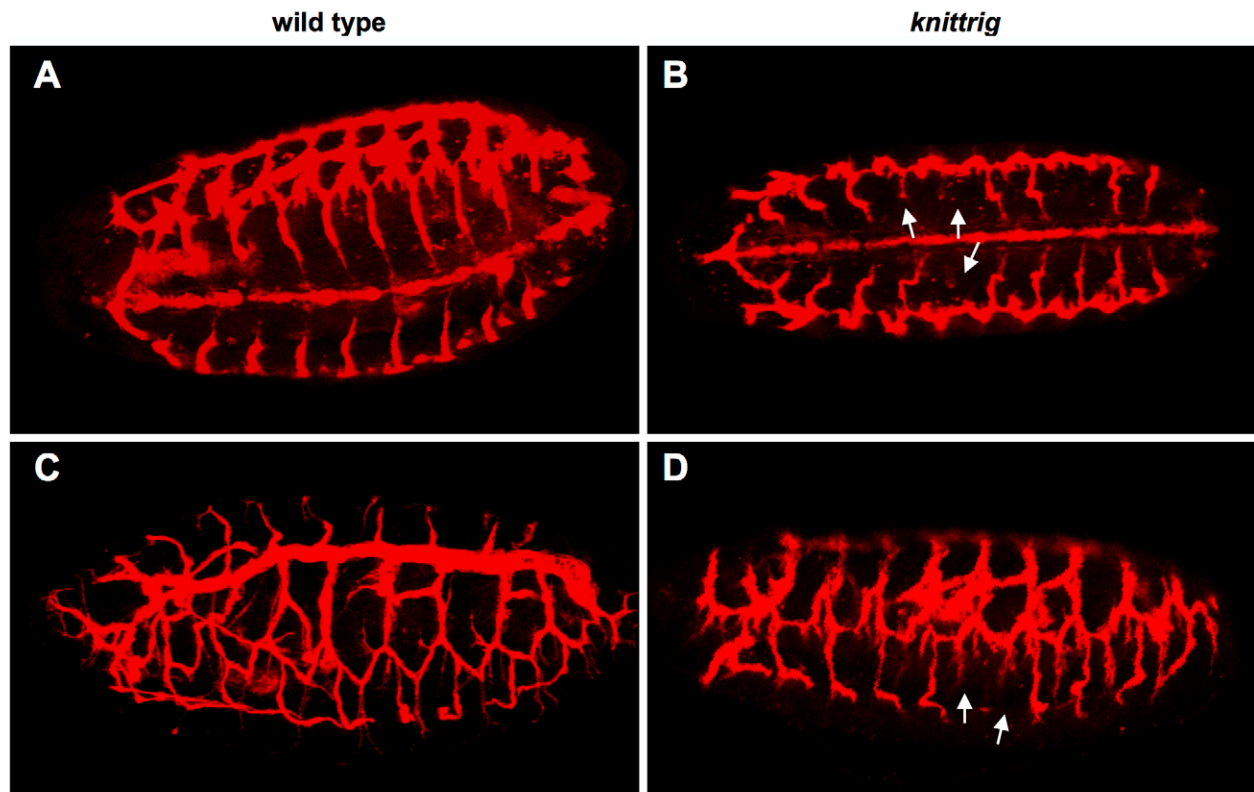

**Fig. S1. *knittrig* function is required in trachea cells.** Defects in the embryonic tracheal-system in *knittrig* mutant embryos are shown. To visualize the tracheae tau-lacZ transgene was driven under control of the *btl-gal4* in mutant embryos. In the mutant embryos one or more ganglionic branches are not formed properly (arrows in B, D) in comparison to wild type embryos (A, C).

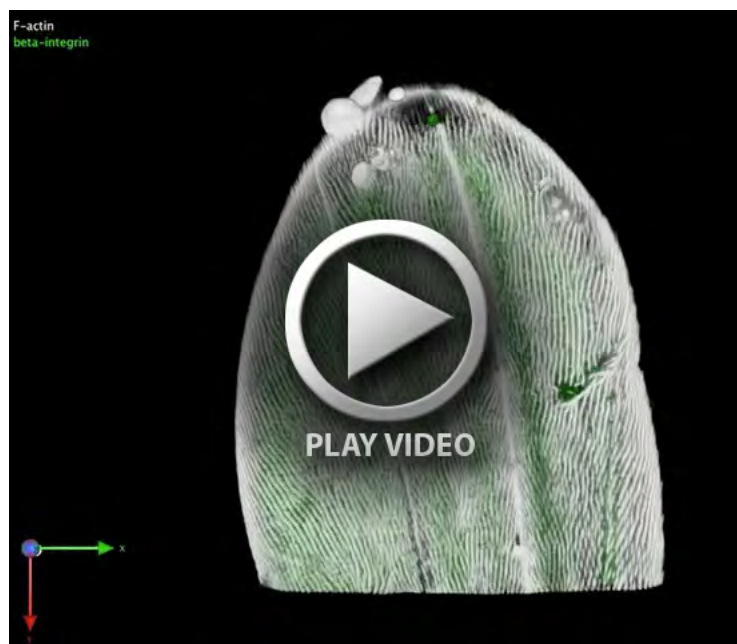

**Movie 1.** 3D reconstruction of a *knittrig* mutant wing of a late pupa (36h APF), reconstructed from confocal images, co-stained for F-actin (phalloidin, white) and  $\beta$ -integrin (green). No morphological defects are visible.

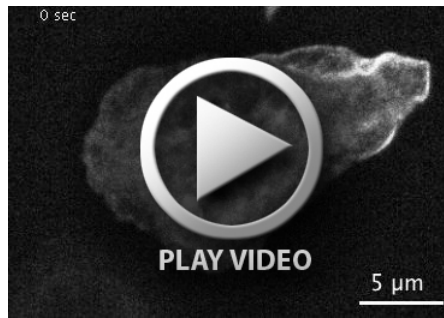

**Movie 2.** Spinning disc microscopy video of an isolated pupal macrophage expressing EGFP-tagged full-length Knittrig driven by the *hmlΔ-gal4* driver, immediately recorded after plating.

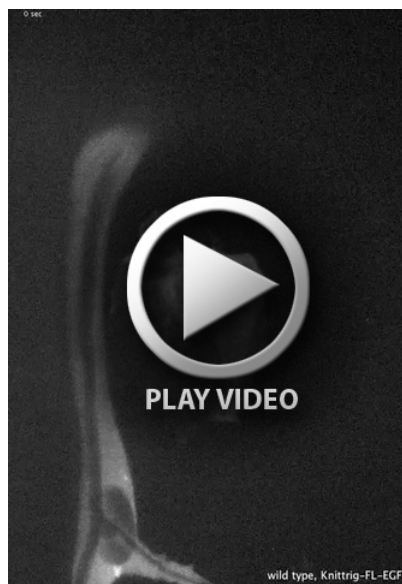

**Movie 3.** Random migration of a macrophage expressing EGFP-Knittrig-FL imaged from a wild type pupa (4 APF). The cell migrates along a trachea.

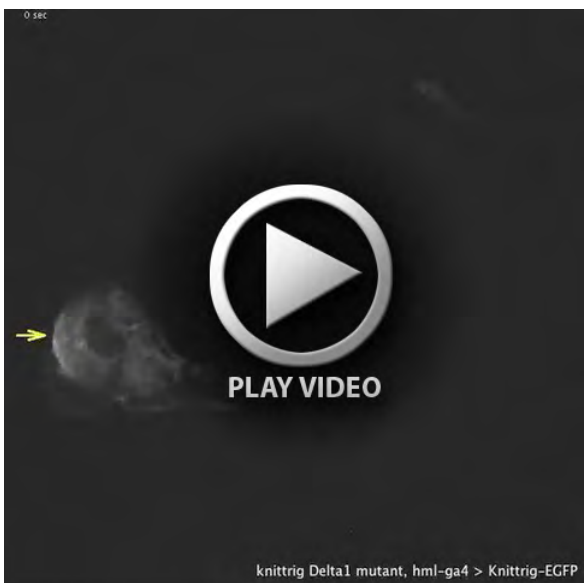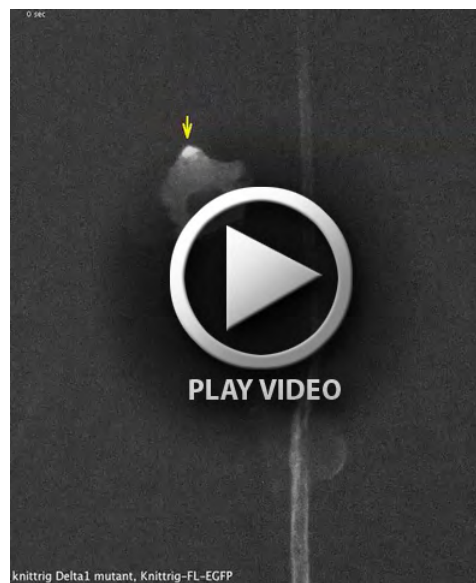

**Movie 4.** (a,b) Two examples of macrophages expressing EGFP-Knittrig-FL imaged from a *knittrig<sup>Δ1</sup>* mutant pupa (4 APF). The positions of the dynamic Knittrig localization is marked by yellow arrows.

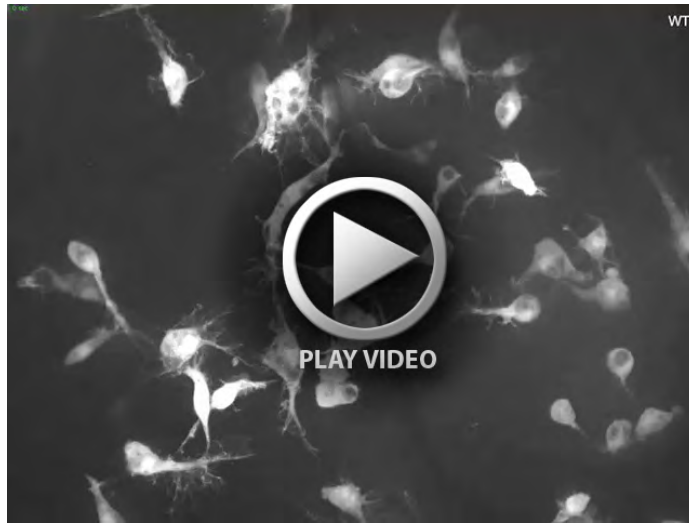

**Movie 5.** Directed cell migration of wild type macrophages expressing cytoplasmic EGFP imaged from a wing of a wild type pupa (20 APF) upon laser induced ablation of a single cell (position is marked by yellow circle).

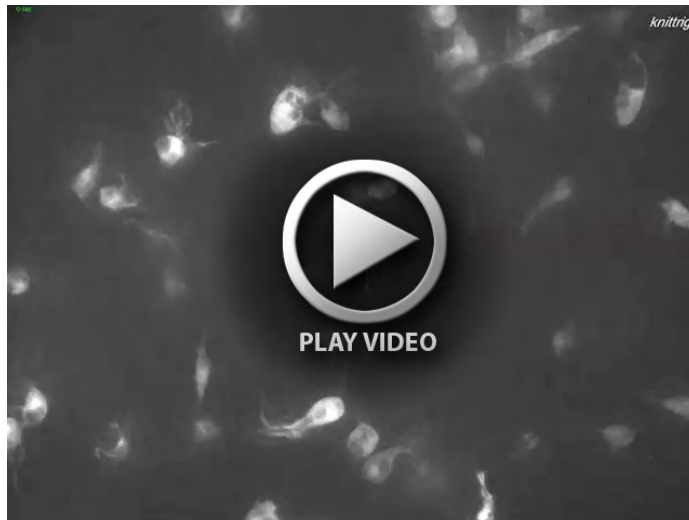

**Movie 6.** Directed cell migration of *knittrig<sup>Δ1</sup>* mutant macrophages imaged from a pupal wing (20 APF) upon laser induced ablation of a single cell.

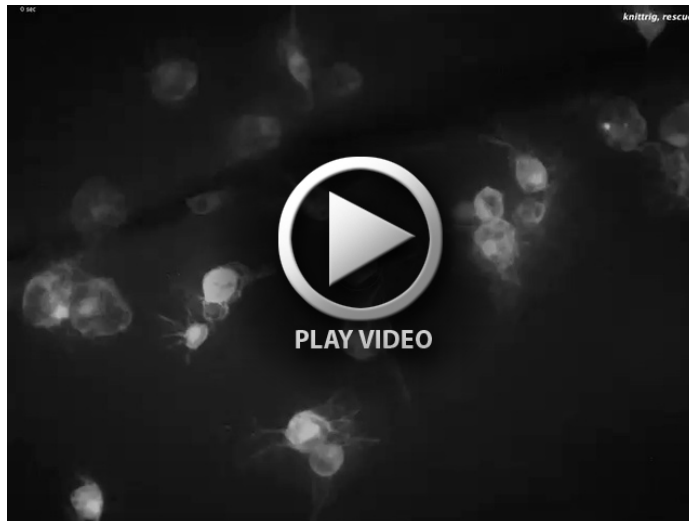

**Movie 7.** Directed cell migration of rescued *knittrig<sup>Δ1</sup>* mutant macrophages imaged from a pupal wing (20 APF) upon laser induced ablation of a single cell.

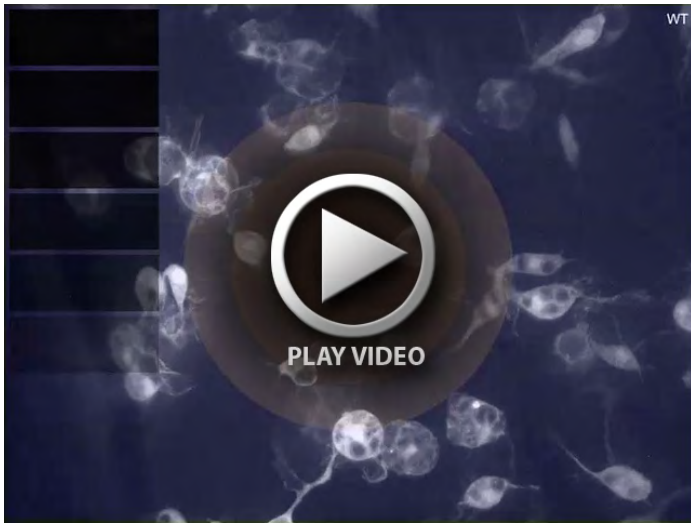

Movie 8.

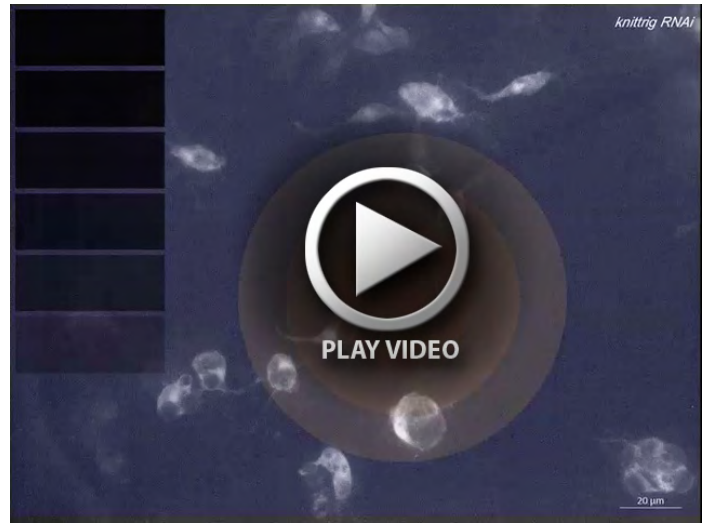

Movie 9.

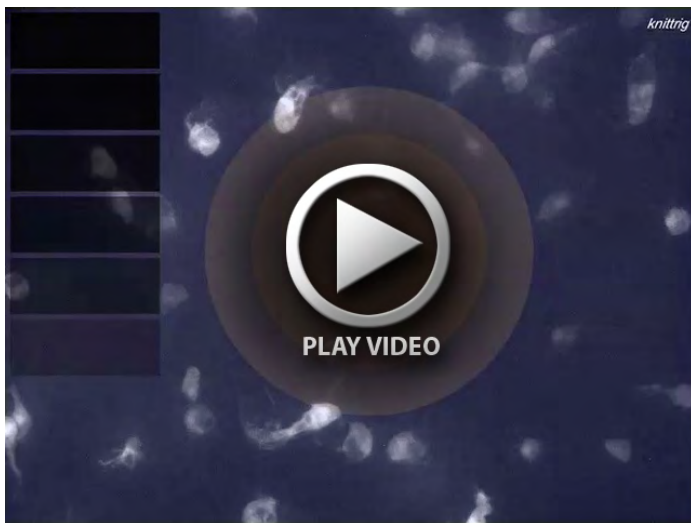

Movie 10.

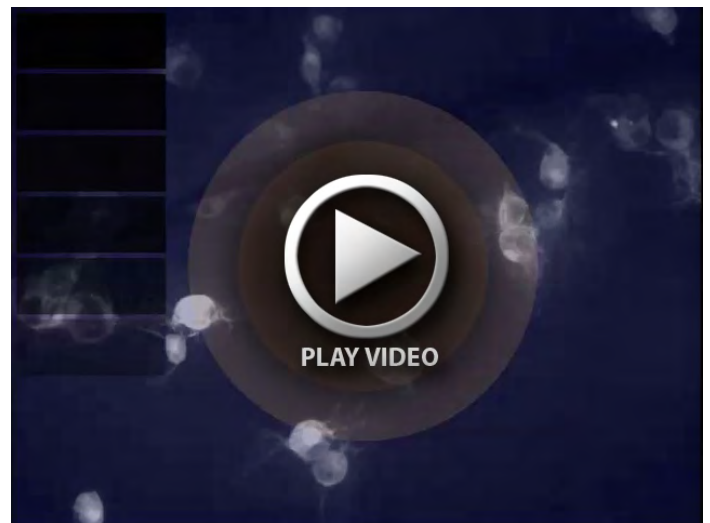

Movie 11.

**Movies 8-11.** Exemplary movies are given for wild type (M8), *knittrig* RNAi (M9), *knittrig*<sup>Δl</sup> (M10) and rescued *knittrig*<sup>Δl</sup> macrophages (M11). Calculated macrophage occurrences  $\omega(R_i, t)$  are given for region  $R_0, R_1, R_2, R_3$  and  $R_4$  in red, dark orange, bright orange, yellow and blue respectively. The purple plot illustrates the  $HMMS(t)$ . Note that the y-axes scaling is adjusted during calculation. The values in the plots for regions  $R_0$ - $R_4$  increase the more macrophages are located in these regions. The  $HMMS(t)$  increases with dense macrophage concentrations in  $R_0$ - $R_3$ , and decreases with dense concentrations in  $R_4$ .



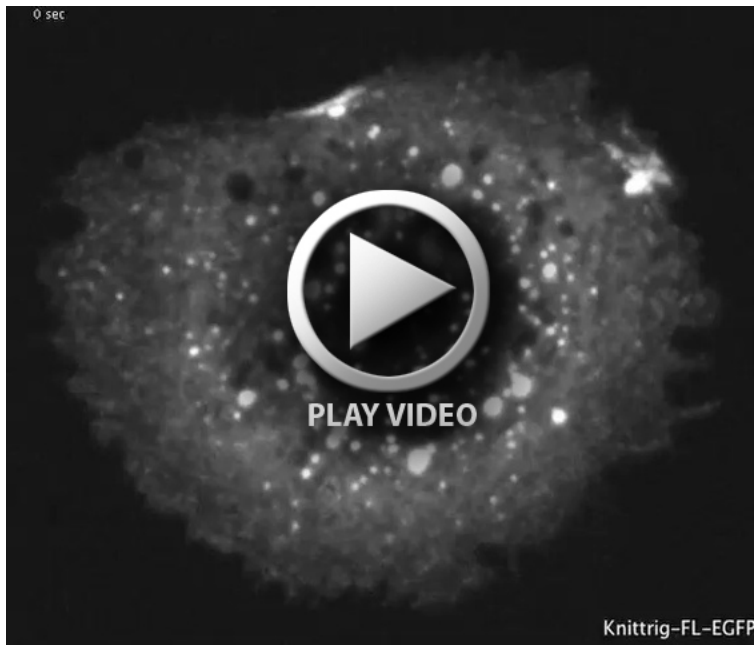

**Movie 12.** Video of a S2R+ cells expressing EGFP-Knittrig-FL, plated on glass.

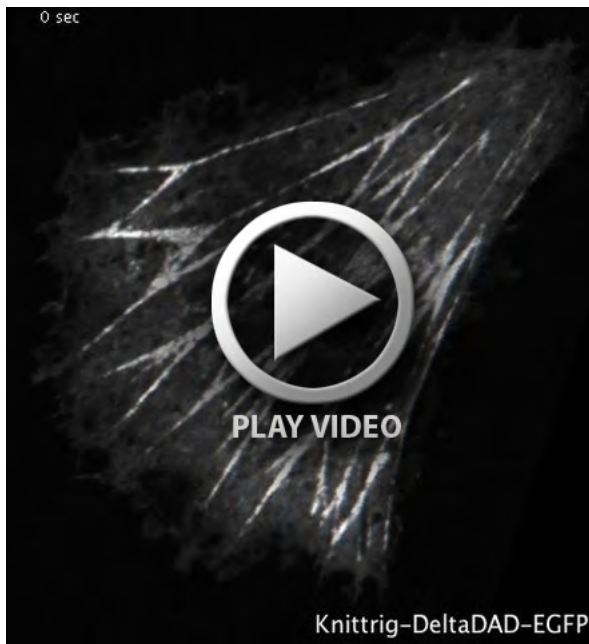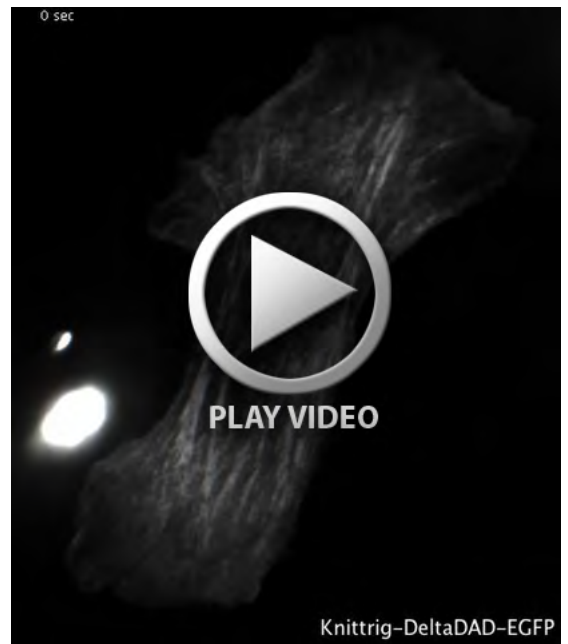

**Movie 13.** (a,b) Two videos of S2R+ cells expressing EGFP-Knittrig- $\Delta$ DAD, plated on glass.

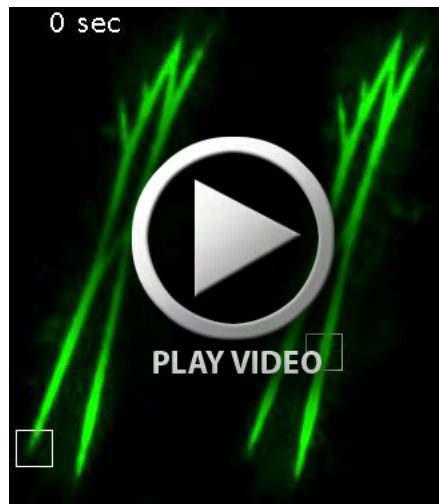

**Movie 14.** Video of a S2R+ cell expressing EGFP-Knittrig- $\Delta$ DAD, bleached at indicated regions at the tip and in the center of Knittrig marked stress fibers.

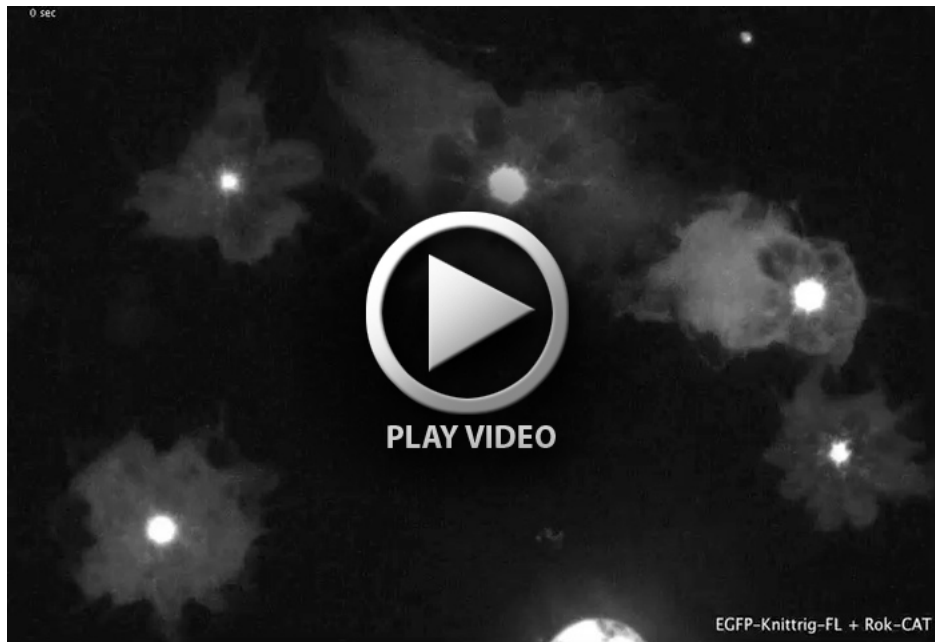

**Movie 15.** Video of S2R+ cells expressing EGFP-Knittrig-FL (white) together with activated Rho kinase Rok-CAT.

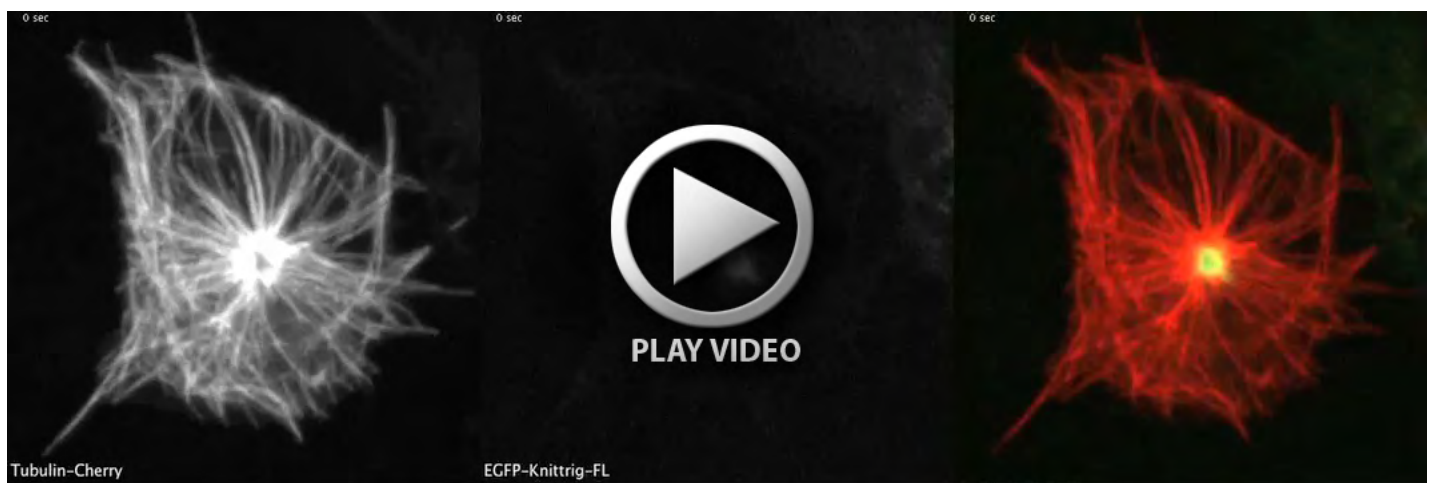

**Movie 16.** Video of S2R+ cells expressing EGFP-Knittrig-FL (white) together with activated Rho kinase Rok-CAT and Tubulin-Cherry (red).

**Table S1. Primers**

| <b>Primer name</b>               | <b>Sequence</b>            | <b>Destination vector</b>              |
|----------------------------------|----------------------------|----------------------------------------|
| 5-Knittrig-PA-FL-TOPO            | CACCATGATTGTGAAAATGGAGCCGG | pENTR/pUAS <sub>t</sub> -attB-rfa-EGFP |
| 3-Knittrig-PA-FL-TOPO            | CTAATAGGTTTGTATCAAGGCAGCC  | pENTR/pUAS <sub>t</sub> -attB-rfa-EGFP |
| 3-Knittrig-PA- $\Delta$ DAD-TOPO | CTAGTCGCCATCGGTGAACTGC     | pENTR/pUAS <sub>t</sub> -attB-rfa-EGFP |
| 3-Knittrig-PA- $\Delta$ B-TOPO   | CTACGGCGTTGTCCGTGTTCTG     | pENTR/pUAS <sub>t</sub> -attB-rfa-EGFP |
| 5-Knittrig-PA-FH2-TOPO           | CACCATGAGCTTGGCACCACCCATG  | pENTR/pUAS <sub>t</sub> -attB-rfa-EGFP |
| 3-Knittrig-PA-FH2-TOPO           | CTAGAACTGCTCCTCGCTTTGGC    | pENTR/pUAS <sub>t</sub> -attB-rfa-EGFP |
